# Supplementary material for: Understanding charge separation in CdS/Ce-UiO66-NH2 heterojunctions for enhanced photocatalytic hydrogen evolution
Source: Royal Society of Chemistry journal article supplement (doi:10.1039/d4se01473a), 2024-11-26
Supplement: d4se01473a1.pdf [file d4se01473a1.pdf]

## Supplementary Information

### **Understanding charge separation in CdS/Ce-UiO66-NH<sub>2</sub> heterojunctions for enhanced photocatalytic hydrogen evolution**

*Wenqing Hou, Sam A. J. Hillman, Soranyel Gonzalez-Carrero, Shilin Yao, Huangtianzhi Zhu and James R. Durrant\**

| Contents                                                                    | Pages |
|-----------------------------------------------------------------------------|-------|
| Table S1. Amounts of reagents for synthesis                                 | 2/7   |
| Table S2. Physical parameters and HER performance of samples                | 2/7   |
| Table S3. Literature survey for H <sub>2</sub> production                   | 3/7   |
| Fig. S1 XRD, BET, FT-IR and PL spectra                                      | 4/7   |
| Fig. S2 H <sub>2</sub> evolution, XRD and XPS for samples of cycle HER test | 5/7   |
| Fig. S3 TA spectra and decay dynamics of scavenging test excited at 420 nm  | 6/7   |
| Reference                                                                   | 7/7   |

**Table S1.** Amounts of reagents used for synthesis of xCdS/Ce-UiO-NH<sub>2</sub> samples

| Reagents                                                     | 20% CdS | 30% CdS | 40% CdS | 50% CdS | CdS   |
|--------------------------------------------------------------|---------|---------|---------|---------|-------|
| Ce-UiO-NH <sub>2</sub> (mg)                                  | 80      | 70      | 60      | 50      | 0     |
| Cd(CH <sub>3</sub> COO) <sub>2</sub> ·2H <sub>2</sub> O (mg) | 36.9    | 55.3    | 73.8    | 92.2    | 184.4 |
| Na <sub>2</sub> S·9H <sub>2</sub> O (mg)                     | 33.2    | 49.8    | 66.4    | 83.0    | 166   |

**Table S2.** Physical parameters and HER performance of different samples<sup>a)</sup>

| Samples                       | $A_{sp}$<br>(m <sup>2</sup> g <sup>-1</sup> ) | $V_{tp}$<br>(cm <sup>3</sup> g <sup>-1</sup> ) | $V_{mp}$<br>(cm <sup>3</sup> g <sup>-1</sup> ) | $d_p$<br>(nm) | $V_{mp}/V_{tp}$ | $d_{cds}$ | $EQE$<br>(%) | $EQE/A_{sp}$<br>(g m <sup>-2</sup> )*10 <sup>-3</sup> |
|-------------------------------|-----------------------------------------------|------------------------------------------------|------------------------------------------------|---------------|-----------------|-----------|--------------|-------------------------------------------------------|
| Ce-UiO-NH <sub>2</sub>        | 942                                           | 0.521                                          | 0.416                                          | 2.2           | 0.80            | --        | n.d.         | n.d.                                                  |
| 20%CdS/Ce-UiO-NH <sub>2</sub> | 548(763)                                      | 0.433(0.481)                                   | 0.141(0.335)                                   | 4.0           | 0.33            | 2.0       | 1.3          | 23.7                                                  |
| 30%CdS/Ce-UiO-NH <sub>2</sub> | 385(674)                                      | 0.389(0.462)                                   | 0.135(0.294)                                   | 4.1           | 0.35            | 2.2       | 1.8          | 46.8                                                  |
| 40%CdS/Ce-UiO-NH <sub>2</sub> | 339(584)                                      | 0.358(0.442)                                   | 0.130(0.254)                                   | 4.4           | 0.36            | 2.3       | 2.2          | 64.9                                                  |
| 50%CdS/Ce-UiO-NH <sub>2</sub> | 261(495)                                      | 0.332(0.422)                                   | 0.108(0.212)                                   | 5.3           | 0.32            | 2.6       | 1.5          | 57.5                                                  |
| CdS                           | 49                                            | 0.323                                          | 0.009                                          | 25.7          | 0.028           | 8.9       | 0.2          | 40.8                                                  |

<sup>a)</sup>  $A_{sp}$ , surface area;  $V_{tp}$ , total pore volume;  $V_{mp}$ , micropore volume;  $d_p$ , average pore size;  $d_{cds}$ , CdS size from X-ray;  $EQE$ : external quantum efficiency. Bracket data are calculated from CdS content added in synthesis.

**Table S3.** Literature survey for H<sub>2</sub> production on different photocatalysts<sup>a)</sup>

| Samples                             | Cat.<br>(mg/mL) | Sacrificial<br>agent                              | Light source                    | H <sub>2</sub><br>( $\mu\text{mol h}^{-1} \text{g}^{-1}$ ) | EQE<br>(%)   | Ref.      |
|-------------------------------------|-----------------|---------------------------------------------------|---------------------------------|------------------------------------------------------------|--------------|-----------|
| CdS/Ce-UiO-NH <sub>2</sub>          | 0.50            | 10% MeOH                                          | 4*3 W (LED/ $\lambda$ = 420 nm) | 2064                                                       | 2.2          | This work |
| CdS/Ce-UiO-NH <sub>2</sub>          | 0.50            | Na <sub>2</sub> S/Na <sub>2</sub> SO <sub>3</sub> | 4*3 W (LED/ $\lambda$ = 420 nm) | 4109                                                       | 4.4          | 1         |
| 0.5% Pt/Ce-UiO-NH <sub>2</sub>      | 0.50            | Na <sub>2</sub> S/Na <sub>2</sub> SO <sub>3</sub> | 4*3 W (LED/ $\lambda$ = 420 nm) | 244                                                        | 0.2          | 1         |
| Ce-UiO-NH <sub>2</sub>              | 1.0             | 20% MeOH                                          | 150 W (Hg-Xe/AM 1.5G)           | 200                                                        | -            | 2         |
| CdS/ZIF                             | 0.87            | -                                                 | 100 W (LED/ $\lambda$ > 400 nm) | 349                                                        | 1.77         | 3         |
| CdS/Zr-UiO-66-NH <sub>2</sub>       | 0.06            | CH <sub>3</sub> CN/H <sub>2</sub> O/LA            | 300 W (Xe/ $\lambda$ > 380 nm)  | 172                                                        | 0.85(420 nm) | 4         |
| CdS/MIL-125-NH <sub>2</sub>         | 0.20            | Na <sub>2</sub> S/Na <sub>2</sub> SO <sub>3</sub> | 350 W (Xe/ $\lambda$ > 420 nm)  | 6620                                                       | -            | 5         |
| CdS/g-C <sub>3</sub> N <sub>4</sub> | 0.10            | 20% TEOA                                          | 300 W (Xe/ $\lambda$ > 400 nm)  | 216                                                        | -            | 6         |
| CdS/UiO-66-(SH) <sub>2</sub>        | 0.50            | Na <sub>2</sub> S/Na <sub>2</sub> SO <sub>3</sub> | 225 W (Xe/420–780 nm)           | 15320                                                      | 11.9         | 7         |
| CdS <sub>4</sub> /Zr-MOF-808        | 0.14            | 8% TEOA                                           | 300 W (Xe/400–800 nm)           | 10410                                                      | -            | 8         |
| CdS/Ni-MOF                          | 0.50            | 6% LA                                             | 300 W (Xe/ $\lambda$ > 420 nm)  | 2508                                                       | -            | 9         |
| CdS/Zn(L-For)-MOF                   | 0.20            | Na <sub>2</sub> S/Na <sub>2</sub> SO <sub>3</sub> | 300 W (Xe/ $\lambda$ > 420 nm)  | 26760                                                      | -            | 10        |

<sup>a)</sup> MeOH: methanol; LA: lactic acid; TEOA: triethanolamine; SH: 2,5-disulfanyl.

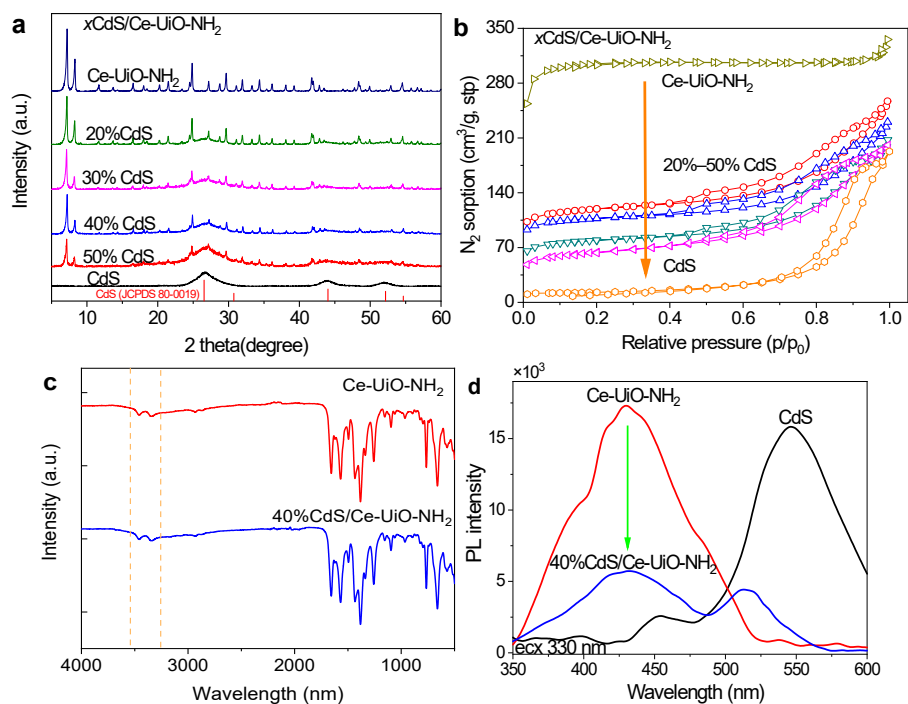

**Fig. S1.** (a) XRD patterns for  $x\text{CdS}/\text{Ce-UiO-NH}_2$ , where  $x$  was 0, 20, 30, 40, and 50 wt%, including the patterns for cubic CdS (JCPDS 80-0019) as reference (red columns at the bottom), (b)  $\text{N}_2$  adsorption and desorption isotherms for  $x\text{CdS}/\text{Ce-UiO-NH}_2$ , (c) FT-IR spectra of  $\text{Ce-UiO-NH}_2$  and  $40\%\text{CdS}/\text{Ce-UiO-NH}_2$ , and (d) the steady-state PL spectra for  $\text{CdS}$ ,  $\text{Ce-UiO-NH}_2$  and  $40\%\text{CdS}/\text{Ce-UiO-NH}_2$ .

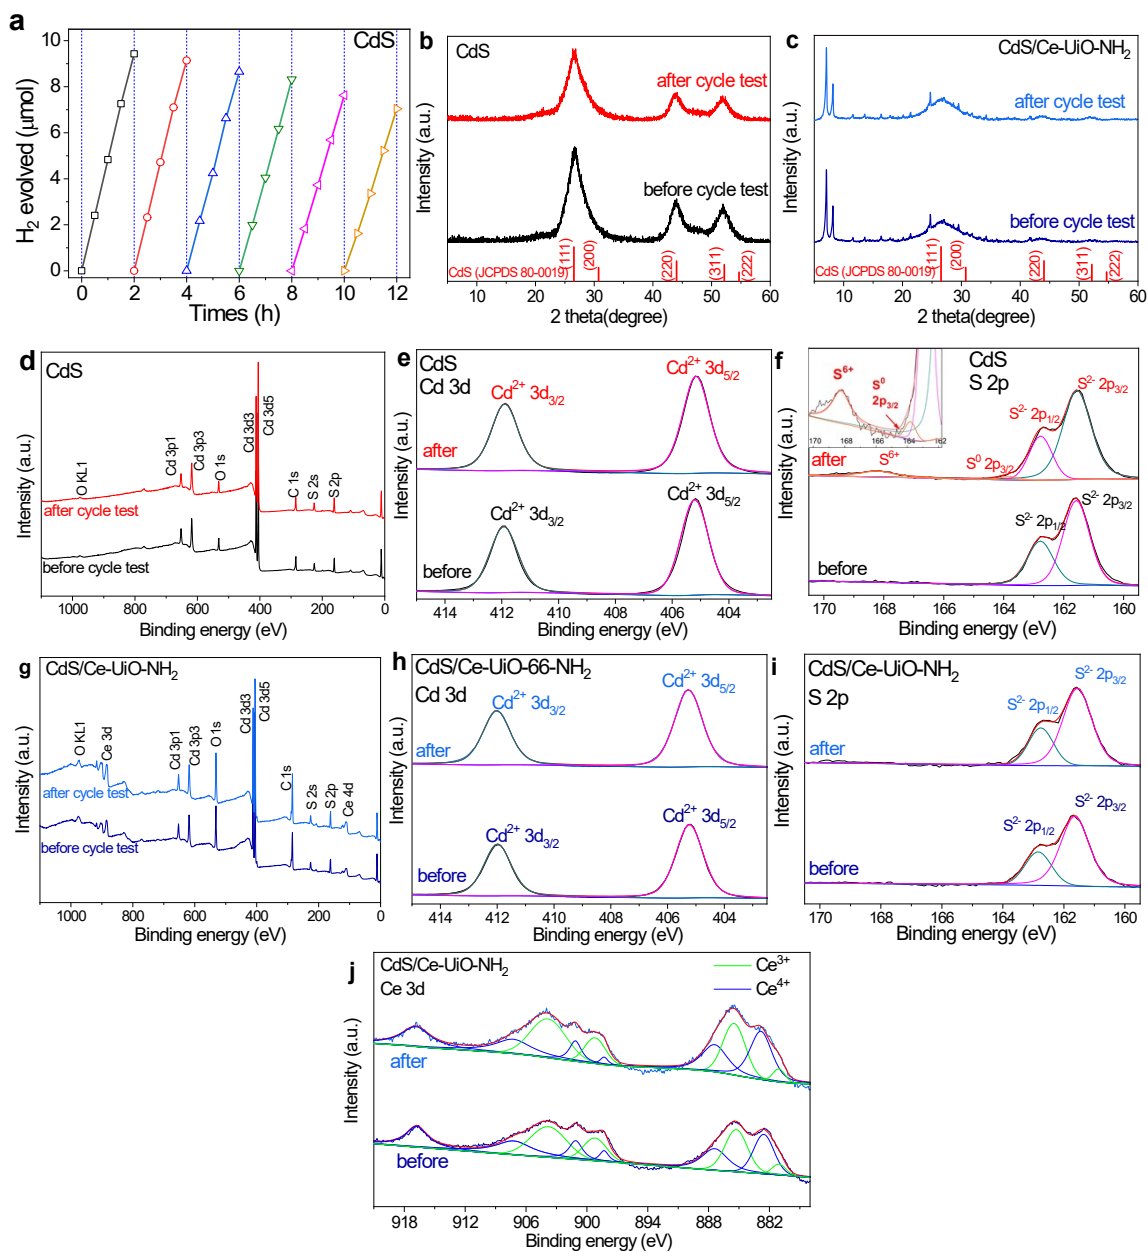

**Fig. S2** (a) 6 sequential 2 h H<sub>2</sub> evolution tests for CdS, (b–c) XRD patterns, and (d–j) XPS spectra for CdS and 40%CdS/Ce-UiO-NH<sub>2</sub>, before and after cycle HER test for 12 h.

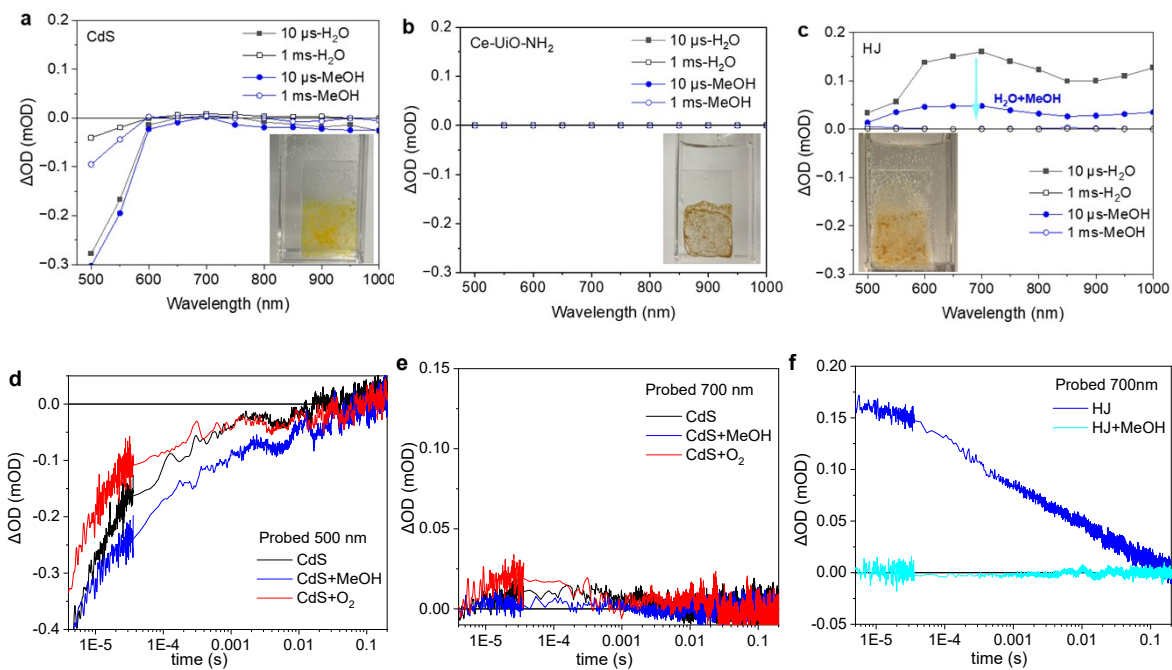

**Fig. S3** (a–c) Transient absorption spectra at different time delays of CdS, Ce-UiO-NH<sub>2</sub> and 40%CdS/Ce-UiO-NH<sub>2</sub> in water. Decay dynamics of (d) CdS probed at 500 nm, (e) CdS probed at 700 nm in Ar-purified DI water, 10 vol% MeOH solution and O<sub>2</sub>-bubbled water. (f) HJ probed at 700 nm in Ar-purified DI water with and without 10 vol% MeOH. All samples were excited at 420 nm (840  $\mu$ J cm<sup>-2</sup>).

## References.

- 1 W. Hou, C. Chen, Y. Wang and Y. Xu, *Catal. Sci. Technol.*, 2022, **12**, 4012–4019.
- 2 S. Dai, E. Montero-Lanzuela, A. Tissot, H. G. Baldoví, H. García, S. Navalón and C. Serre, *Chem. Sci.*, 2023, **14**, 3451–3461.
- 3 L. Shiuan Ng, T. Raja Mogan, J.-K. Lee, H. Li, C.-L. Ken Lee and H. Kwee Lee, *Angew. Chem. Int. Ed.*, 2023, **62**, e202313695.
- 4 H.-Q. Xu, S. Yang, X. Ma, J. Huang and H.-L. Jiang, *ACS Catal.*, 2018, **8**, 11615–11621.
- 5 X. Zhang, Z. Chen, Y. Luo, X. Han, Q. Jiang, T. Zhou, H. Yang and J. Hu, *J Hazard. Mater.*, 2021, **405**, 124128.
- 6 C. Ji, C. Du, J. D. Steinkruger, C. Zhou and S. Yang, *Mater. Lett.*, 2019, **240**, 128–131.
- 7 S. Mao, Y. Zou, G. Sun, L. Zeng, Z. Wang, D. Ma, Y. Guo, Y. Cheng, C. Wang and J.-W. Shi, *J Colloid Interface Sci.*, 2021, **581**, 1–10.
- 8 A. Ghosh, S. Karmakar, F. A. Rahimi, R. S. Roy, S. Nath, U. K. Gautam and T. K. Maji, *ACS Appl. Mater. Interfaces*, 2022, **14**, 25220–25231.
- 9 J. Guo, Y. Liang, L. Liu, J. Hu, H. Wang, W. An and W. Cui, *Appl. Surf. Sci.*, 2020, **522**, 146356.
- 10 L.-X. Chi, N. D. Clarisse, S. Yang, W.-L. Bao, M. Xiao, Y.-P. Zhao, J.-T. Wang, Q. Chen and Z.-H. Zhang, *J. Solid State Chem.*, 2023, **324**, 124117.
